# Supplementary material
Source: PubMed Central journal article supplement (PMC3932925)
Supplement: 1400744111_pnas.201400744SI.pdf [file 1400744111_pnas.201400744SI.pdf]

# Supporting Information

Staal et al. 10.1073/pnas.1400744111

**Table S1. Primer sequences for PCR genotyping and RT-PCR**

| Primer name | Primer sequence                  |
|-------------|----------------------------------|
| p1          | 5'-CTTGTGGCCTCCATTTTCTCCAC-3'    |
| p2          | 5'-CCGAATTCCTGCAGATAACTTCG-3'    |
| p3          | 5'-CATACATTATACGAAGTTATGGATCC-3' |
| p4          | 5'-CAGCCAAGAACCCTGATCAATG-3'     |
| p5          | 5'-TAGCCAAAGCTGACACTGAAGC-3'     |
| p6          | 5'-CCTTCAAATTTGTAAAGCCAGGTG-3'   |
| p7          | 5'-GACAATTTGAGCAACTTGACTTGG-3'   |
| p8          | 5'-GGTACTTAGTTGTTGCAGGTAAG-3'    |
| p9          | 5'-CCTTCTATCGCCTTCTTGACG-3'      |
| Cre-F       | 5'-CGATGCAACGAGTGATGAGGTTTC-3'   |
| Cre-R       | 5'-GCACGTTACCCGGCATCAAC-3'       |
| FLPer-F     | 5'-CACTGATATTGTAAGTAGTTTGC-3'    |
| FLPer-R     | 5'-CTAGTGCGAAGTAGTGATCAGG-3'     |
| Mig6-F      | 5'-AAATTTGAAGGCATCCAGAG-3'       |
| Mig6-R      | 5'-CATTATCCCATGTAACCTTCTG-3'     |
| Actin-F     | 5'-CTCTTTGATGTCACGCACGATTTTC-3'  |
| Actin-R     | 5'-GTGGGCCGCTCTAGGCACCAA-3'      |
